# Supplementary figures and images for: Gene-free methodology for cell fate dynamics during development
Source: eLife journal article supplement (doi:10.7554/elife.30743), 2017-12-12

**A**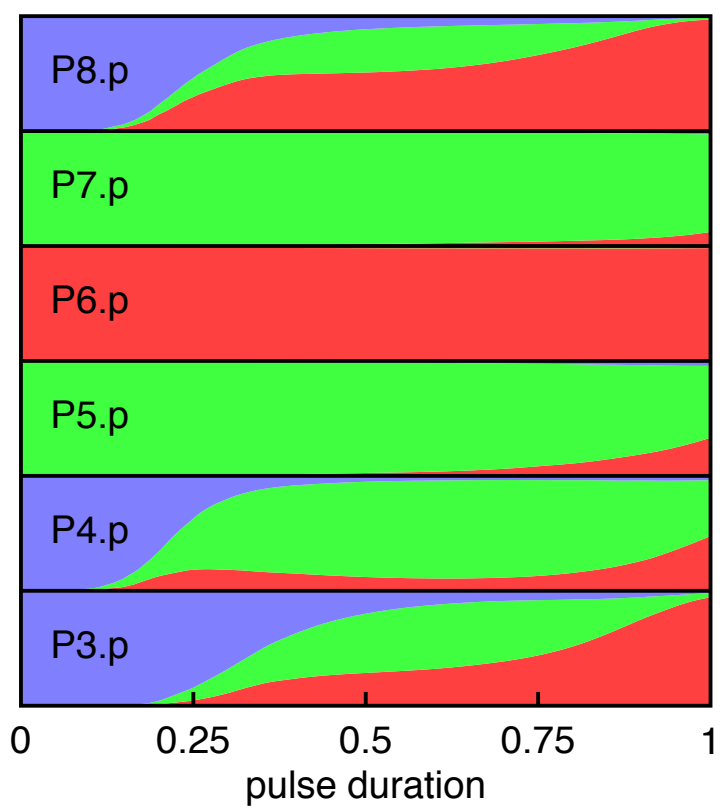**B**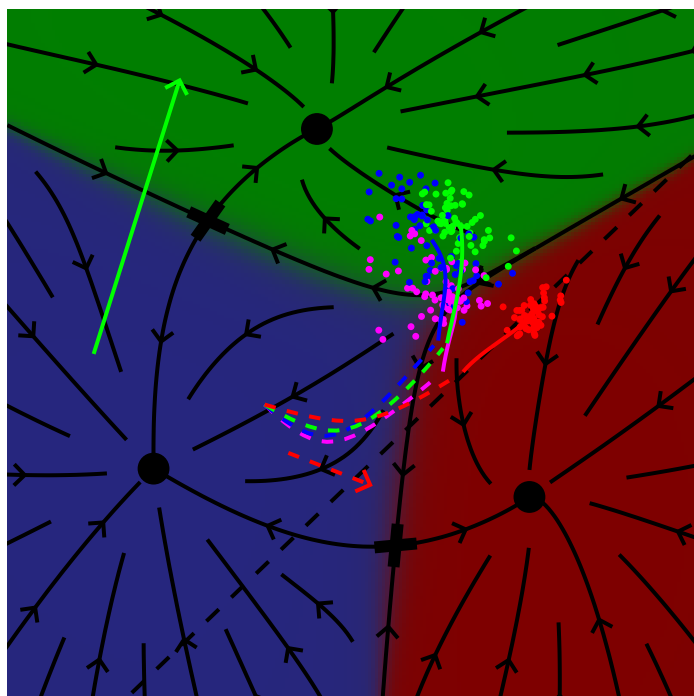

Supplement: supp [file elife-30743-supp-v1.zip]

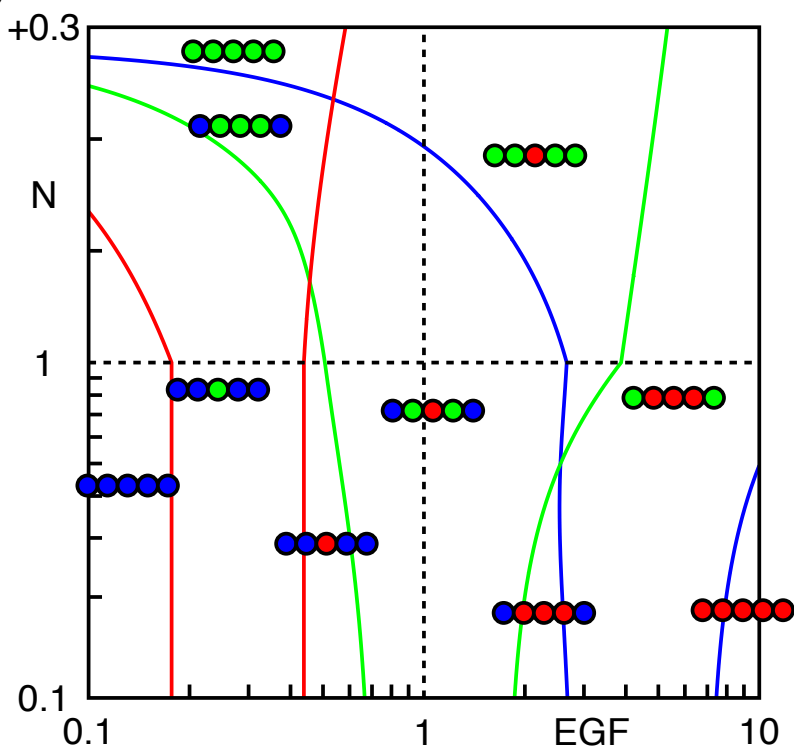

Supplement: supp [file elife-30743-supp-v1.zip]

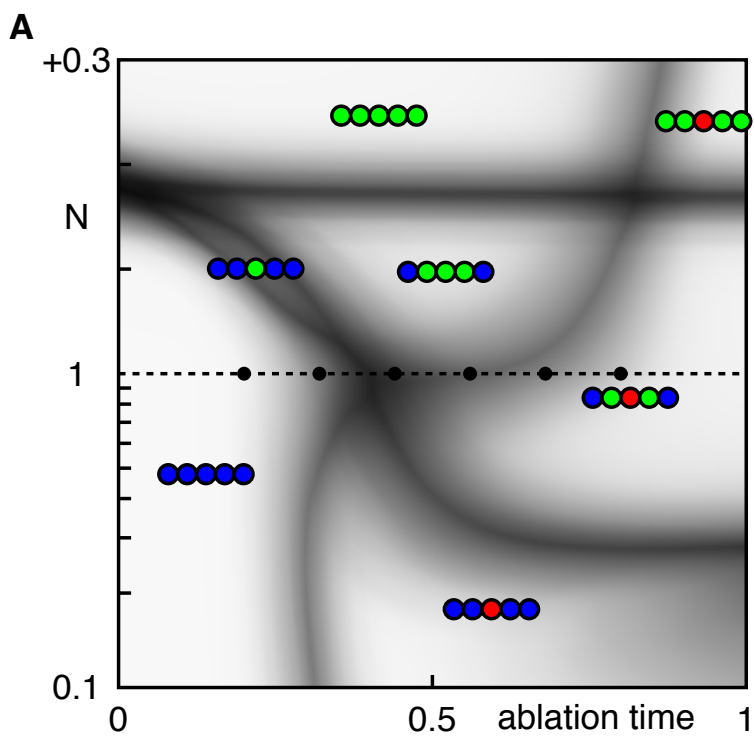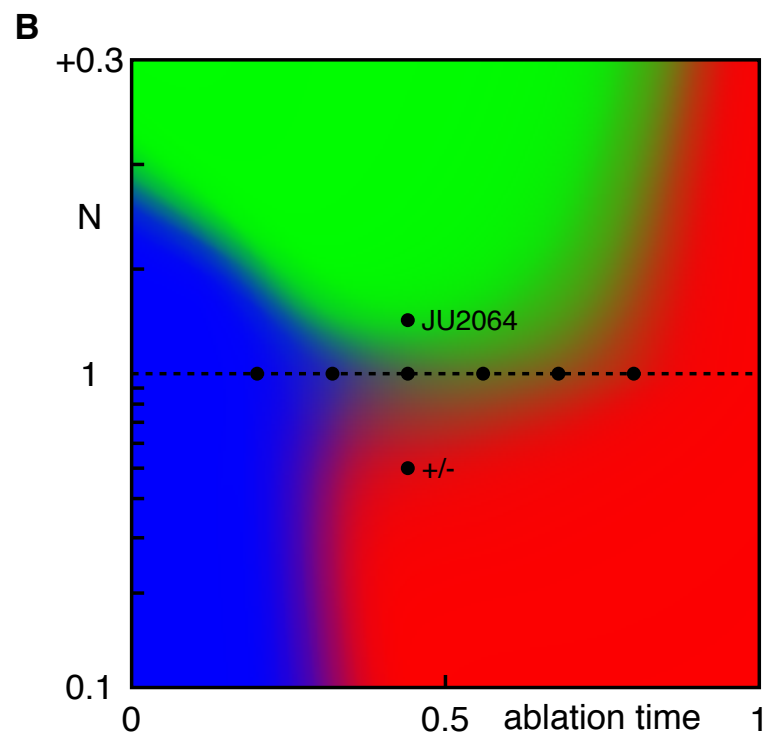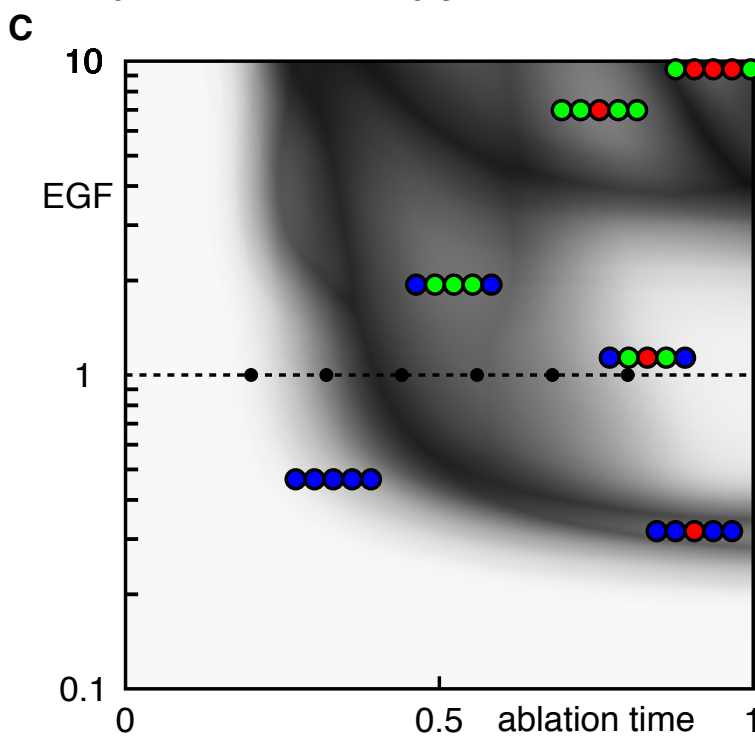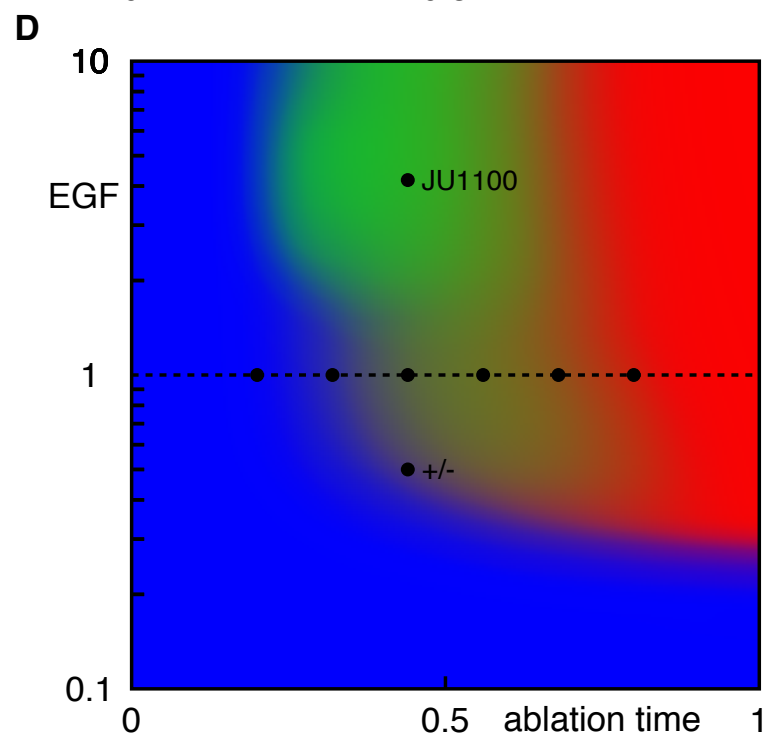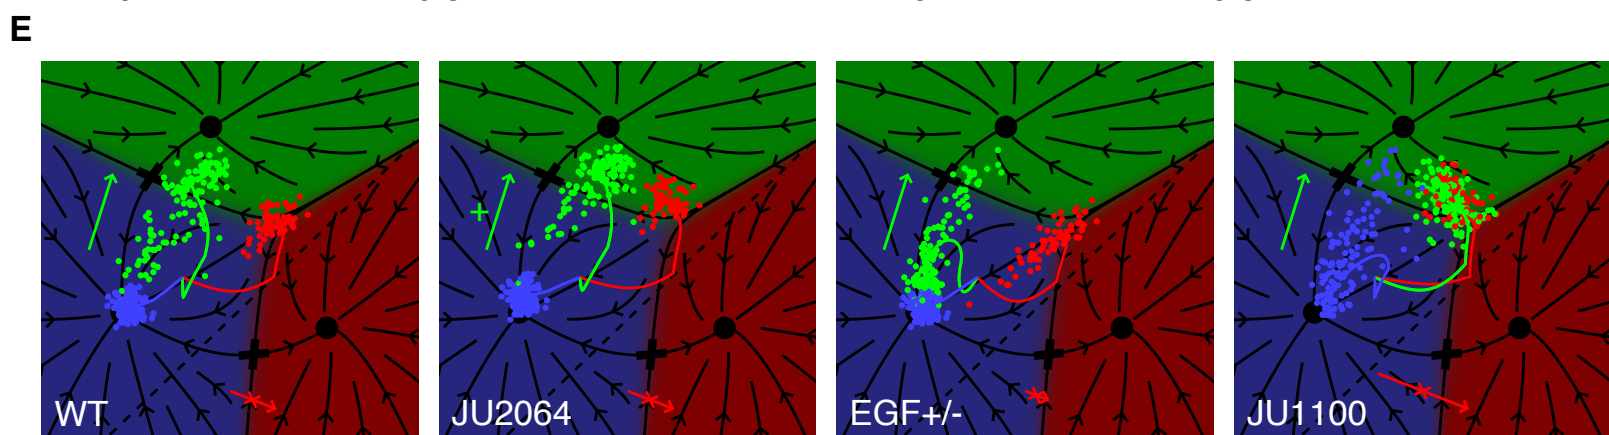

Supplement: supp [file elife-30743-supp-v1.zip]

**A**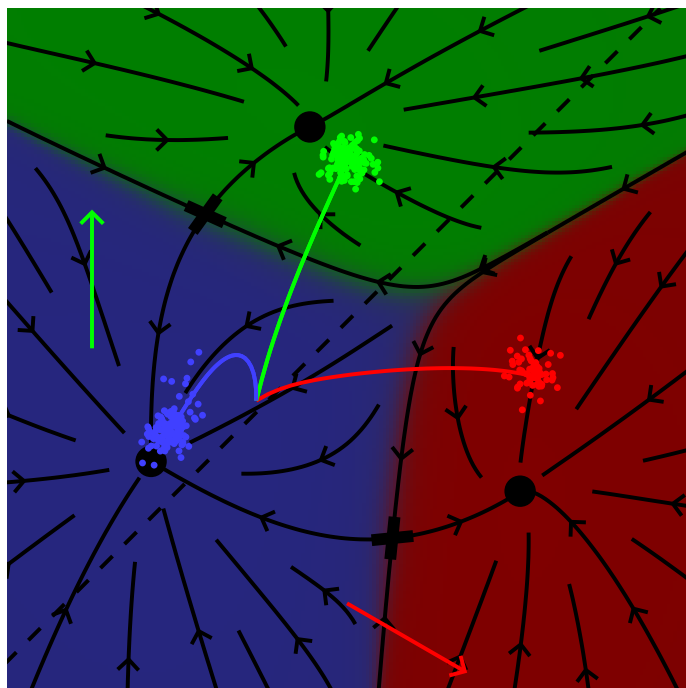**B**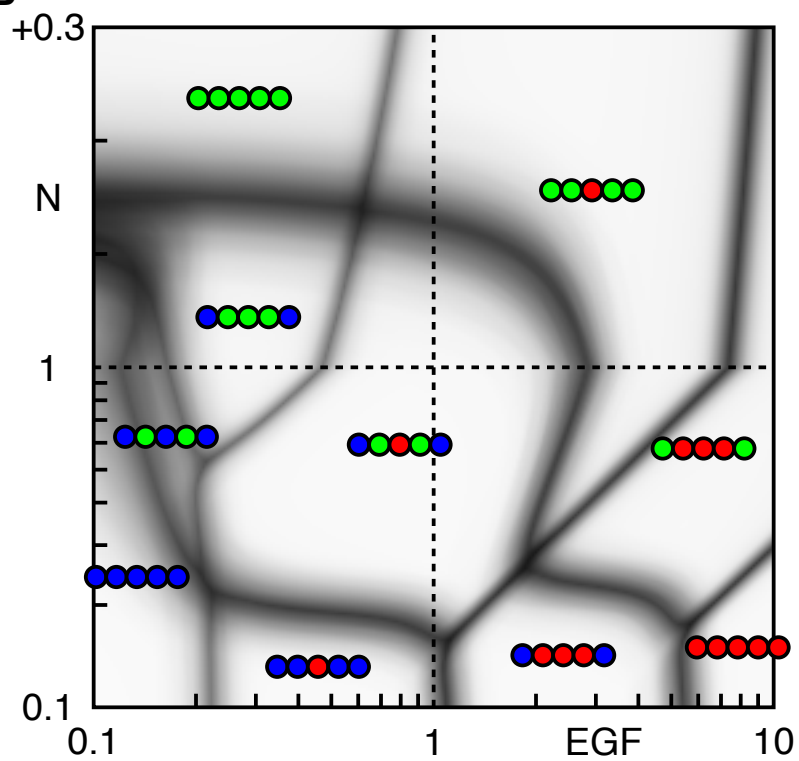**C**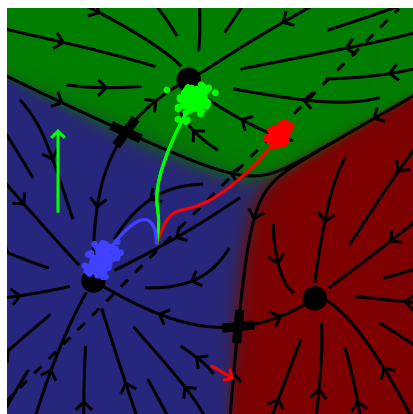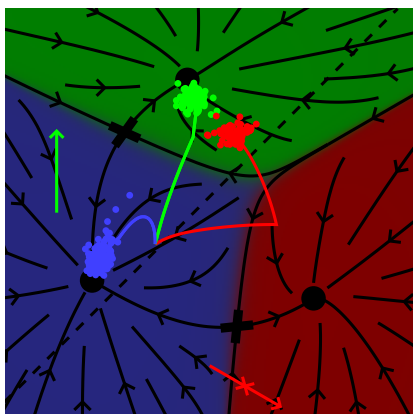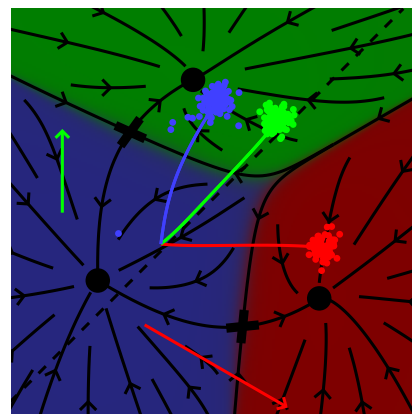

Supplement: supp [file elife-30743-supp-v1.zip]

**A**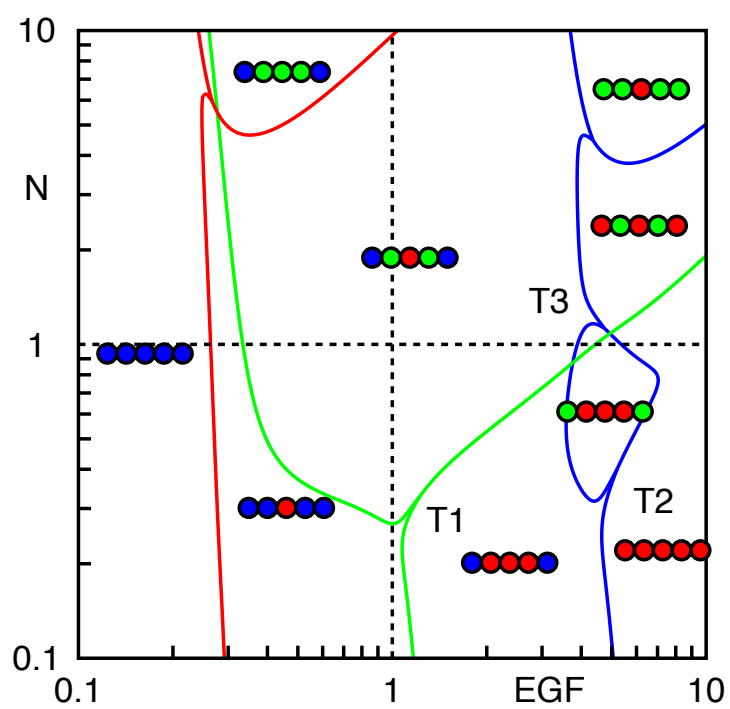**B**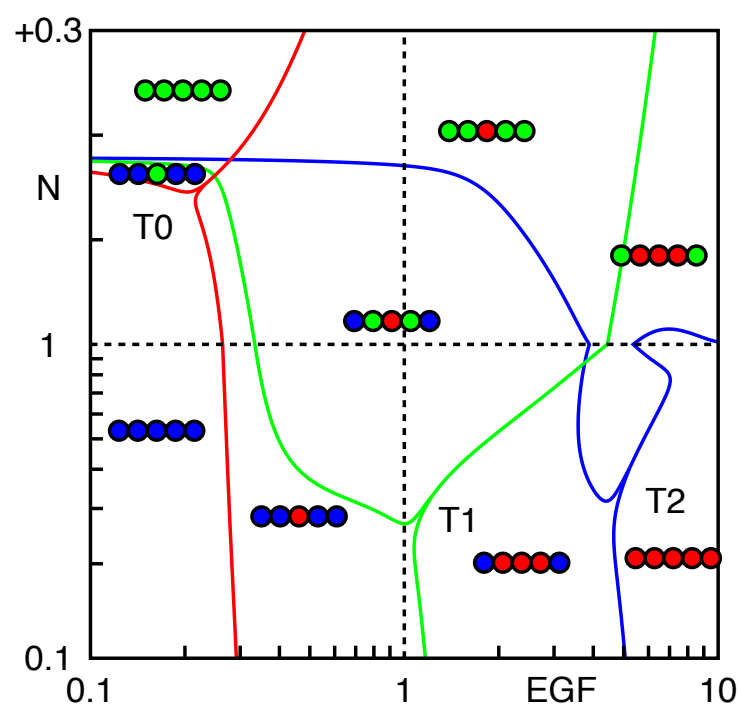

Supplement: supp [file elife-30743-supp-v1.zip]

**A**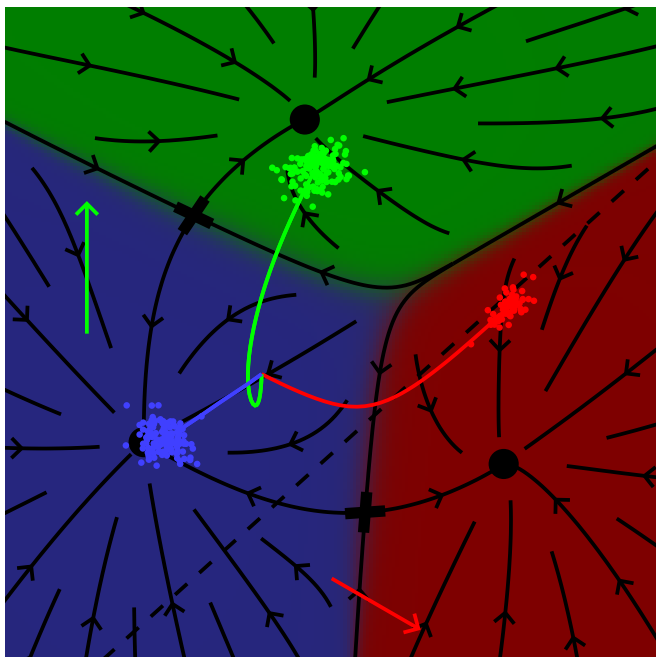**B**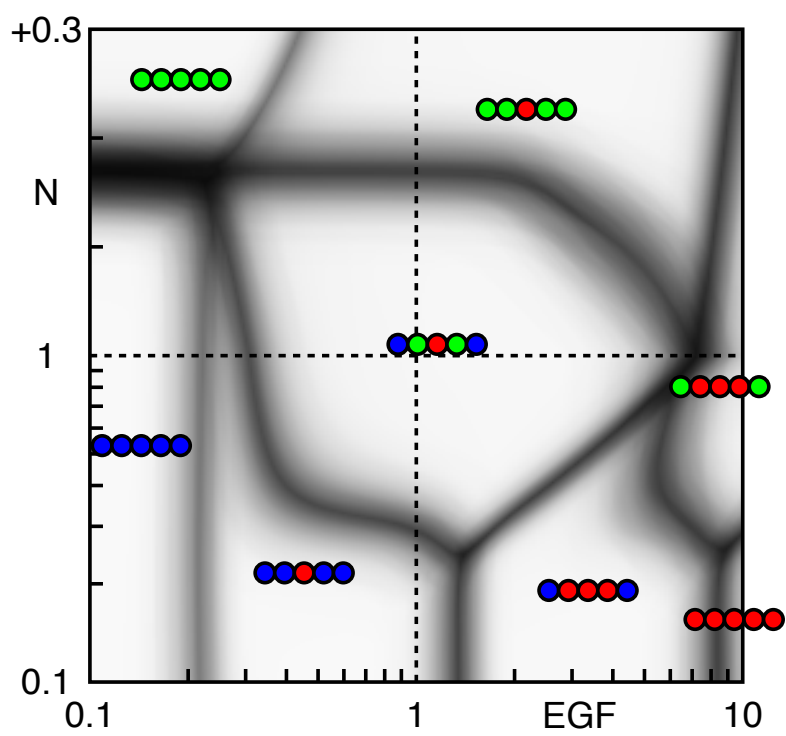

Supplement: supp [file elife-30743-supp-v1.zip]

**A**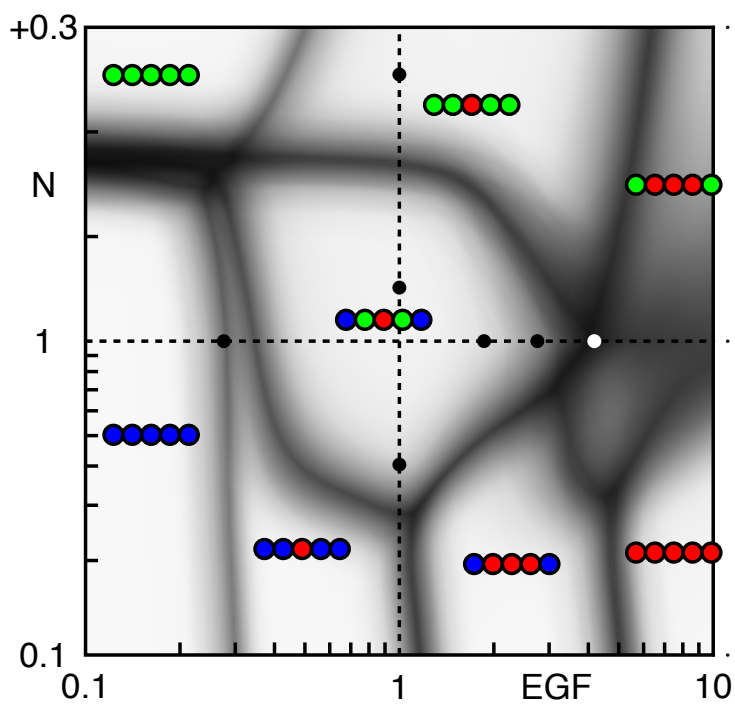**B**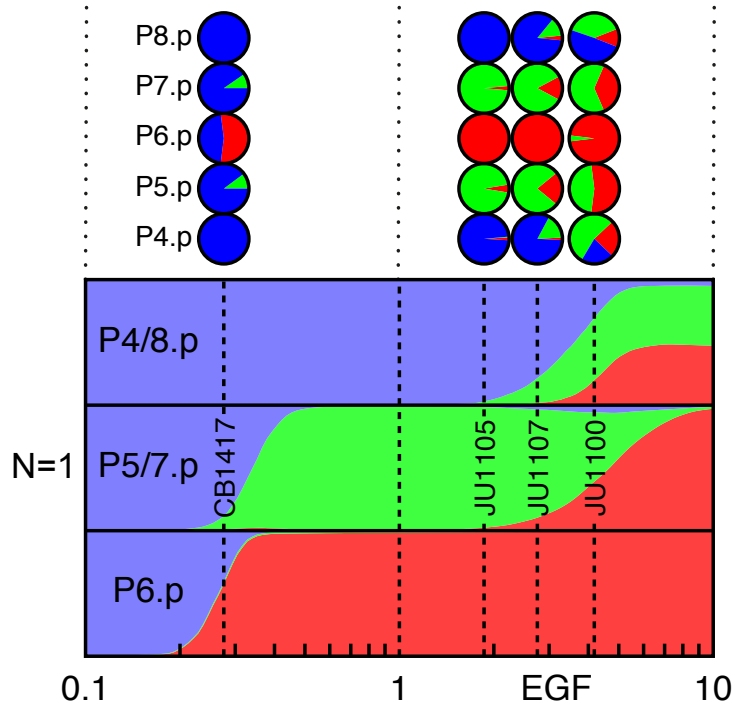**C**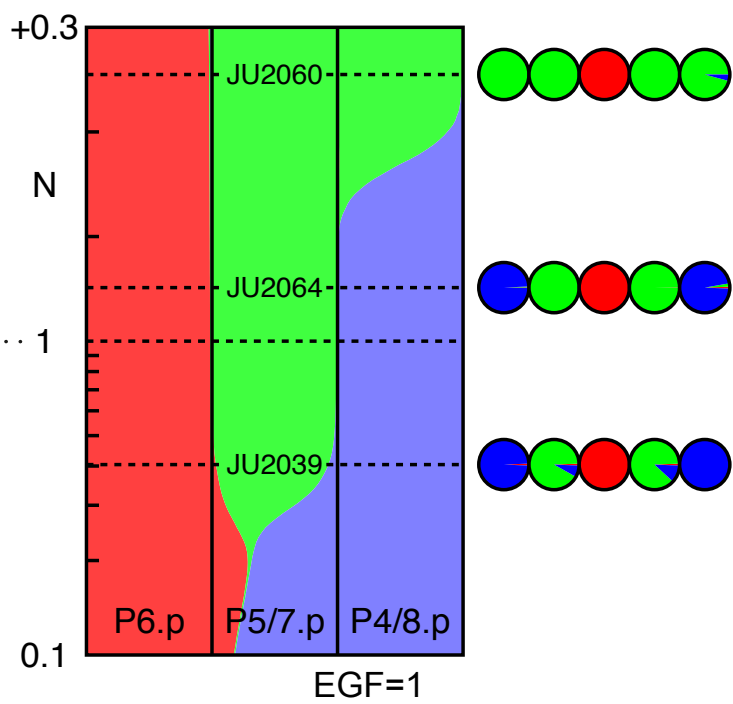

Supplement: supp [file elife-30743-supp-v1.zip]

**A**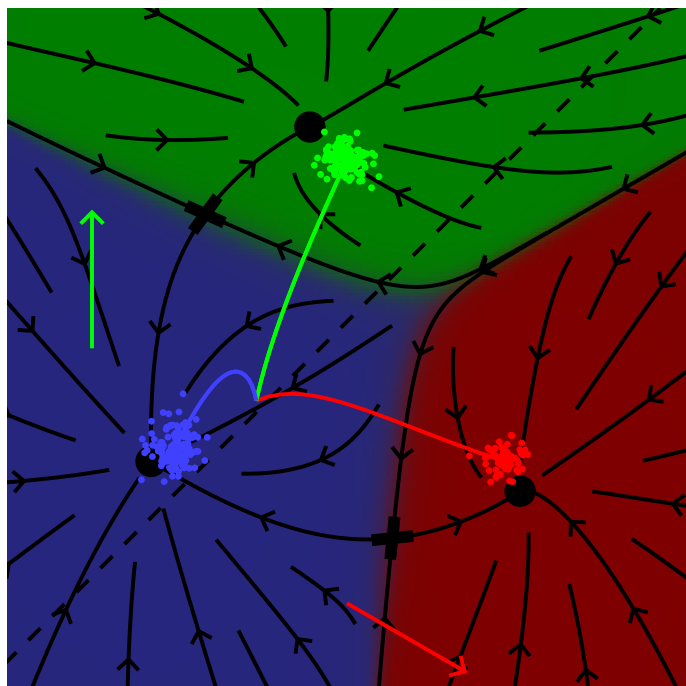**B**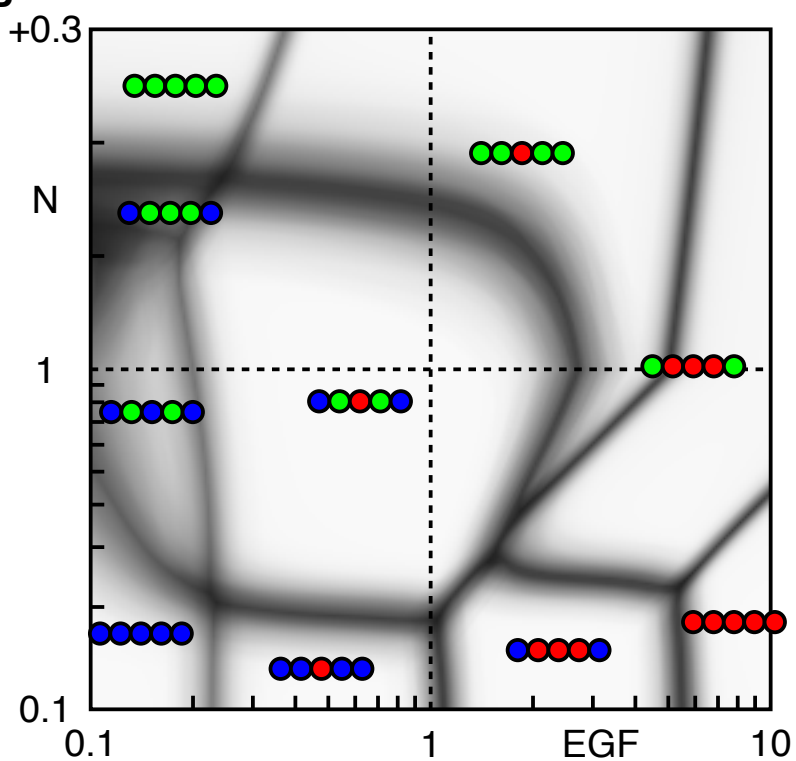**C**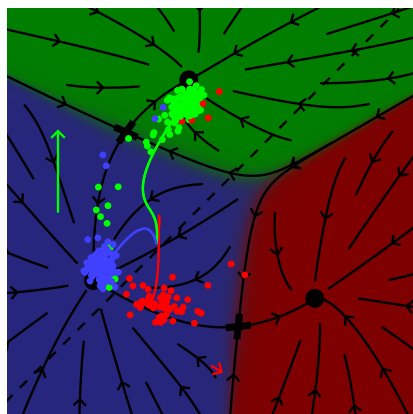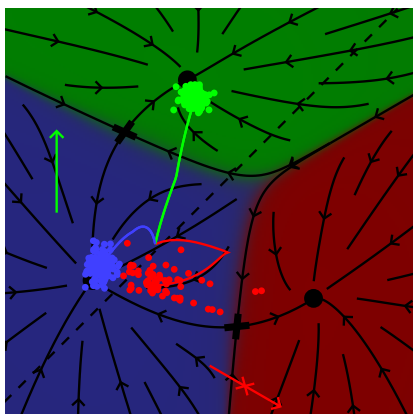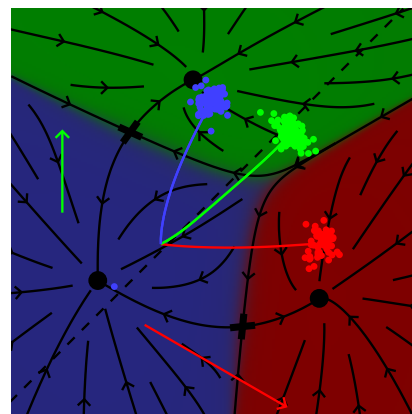

Supplement: supp [file elife-30743-supp-v1.zip]
